# Supplementary material for: Bacteria Display Differential Growth and Adhesion Characteristics on Human Hair Shafts
Source: PubMed Central journal article supplement (PMC6137140; doi:10.3389/fmicb.2018.02145), 2018-09-07
Supplement: Data_Sheet_1.pdf [file Data_Sheet_1.pdf]

# **Bacteria display differential growth and adhesion characteristics on human hair shafts**

Swat Kim Kerk<sup>1</sup>, Hui Ying Lai<sup>3,4</sup>, Siu Kwan Sze<sup>2</sup>, Kee Woei Ng<sup>3,4,5</sup>, Artur Schmidtchen<sup>1,6,7</sup>,

Sunil S Adav<sup>1,2\*</sup>

<sup>1</sup>Lee Kong Chian School of Medicine, Nanyang Technological University, 59 Nanyang Drive, Singapore, 636921, <sup>2</sup>School of Biological Sciences, Nanyang Technological University, 60 Nanyang Drive, Singapore 637551, <sup>3</sup>School of Materials Science and Engineering, Nanyang Technological University, Singapore, <sup>4</sup>Nanyang Environment & Water Research Institute, Interdisciplinary Graduate School, Nanyang Technological University, Singapore, <sup>5</sup>Skin Research Institute of Singapore, Singapore, <sup>6</sup>Wound Healing Centre, Bispebjerg University Hospital, Copenhagen, Denmark, <sup>7</sup>Division of Dermatology and Venereology, Department of Clinical Sciences, Lund University, Lund, Sweden

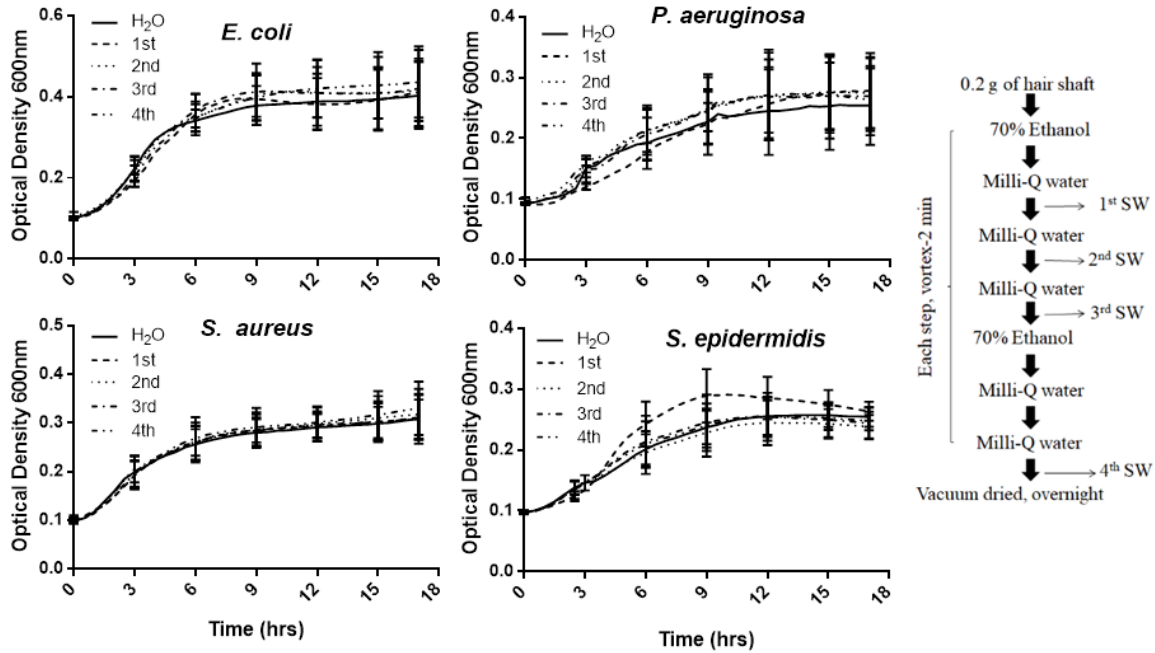

Figure S1. Evaluation of standard wash solution. Hair shafts were prepared for the experiment by adopting the washing as shown in the right panel, washings were collected and labeled as 1<sup>st</sup>-4<sup>th</sup> SW (Standard Wash) and analyzed for antimicrobial activity. Statistical significance is analyzed by two-way ANOVA.

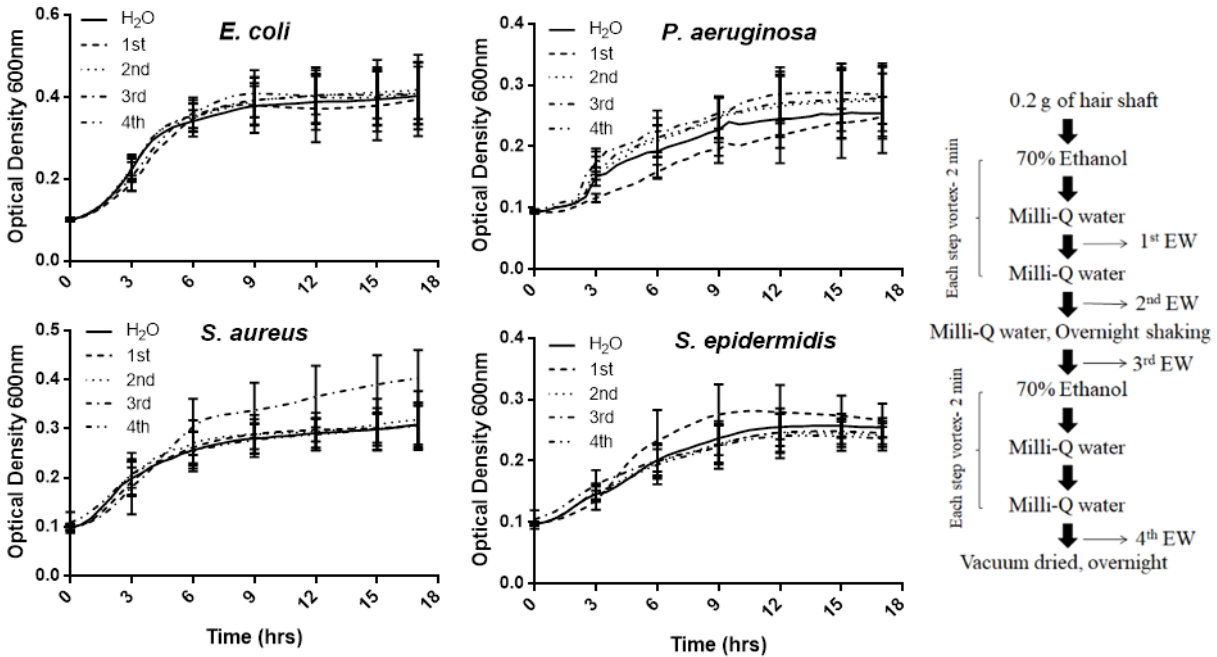

Figure S2. Evaluation of extensive wash solution for antimicrobial activity. Hair shafts were washed extensively by adopting the washing as shown in the right panel, washings were collected and labeled as 1<sup>st</sup>-4<sup>th</sup> EW (extensive wash) and analyzed for antimicrobial activity. Statistical significance is analyzed by two-way ANOVA.

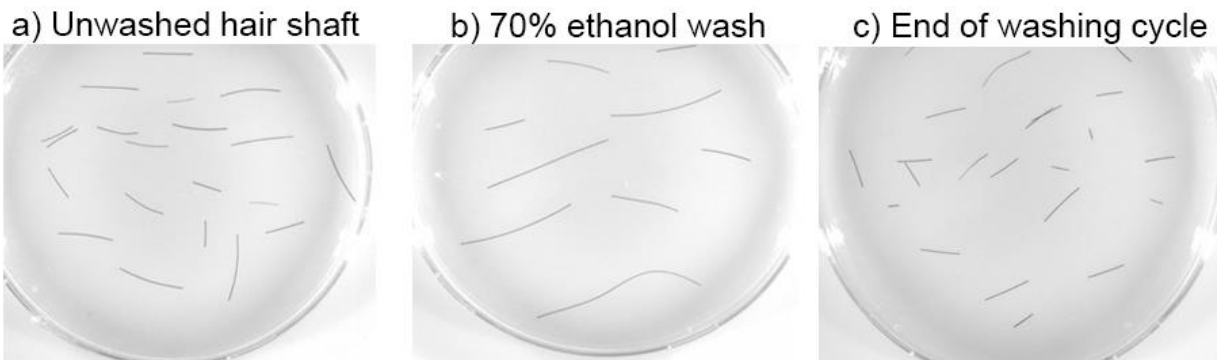

Figure S3. Evaluation of hair shafts for bacterial contamination. The hair shaft samples were incubated with LB agar in a petri dish 72 h at 37 °C and evaluated for bacterial contamination a) The hairs shafts sample before subjected to washing, b) disinfected with 70% ethanol, c) complete standard wash hair shafts.

Table S1. Hair shaft donor's details. The donor's donated hair shaft at morning was after a bath and that donated hair at evening has taken bath at morning.

| <b>Donor ID</b> | <b>Gender</b> | <b>Age</b> | <b>Shampoo Brand</b> | <b>Hair Wax</b> | <b>Chemical Treatment</b> | <b>Hair donation time</b> |
|-----------------|---------------|------------|----------------------|-----------------|---------------------------|---------------------------|
| H001            | Male          | 28         | Clear                | Yes             | No                        | Morning                   |
| H002            | Male          | 25         | Sunsilk              | Yes             | No                        | Evening                   |
| H003            | Male          | 24         | Sunsilk              | No              | No                        | Evening                   |
| H006            | Male          | 38         | Loreal               | No              | No                        | Evening                   |
| H012            | Female        | 25         | Head & Shoulders     | No              | No                        | Morning                   |
| H013            | Male          | 18         | Head & Shoulders     | No              | No                        | Morning                   |
| H015            | Male          | 28         | Dove                 | No              | No                        | Evening                   |
